# Supplementary material for: Fine Structure of the Mouthparts of Three Tomicus Beetles Co-Infecting Pinus yunnanensis in Southwestern China with Some Functional Comments
Source: MDPI journal article supplement (doi:10.3390/insects14120933), 2023-12-07
Supplement: s1 [file s1]

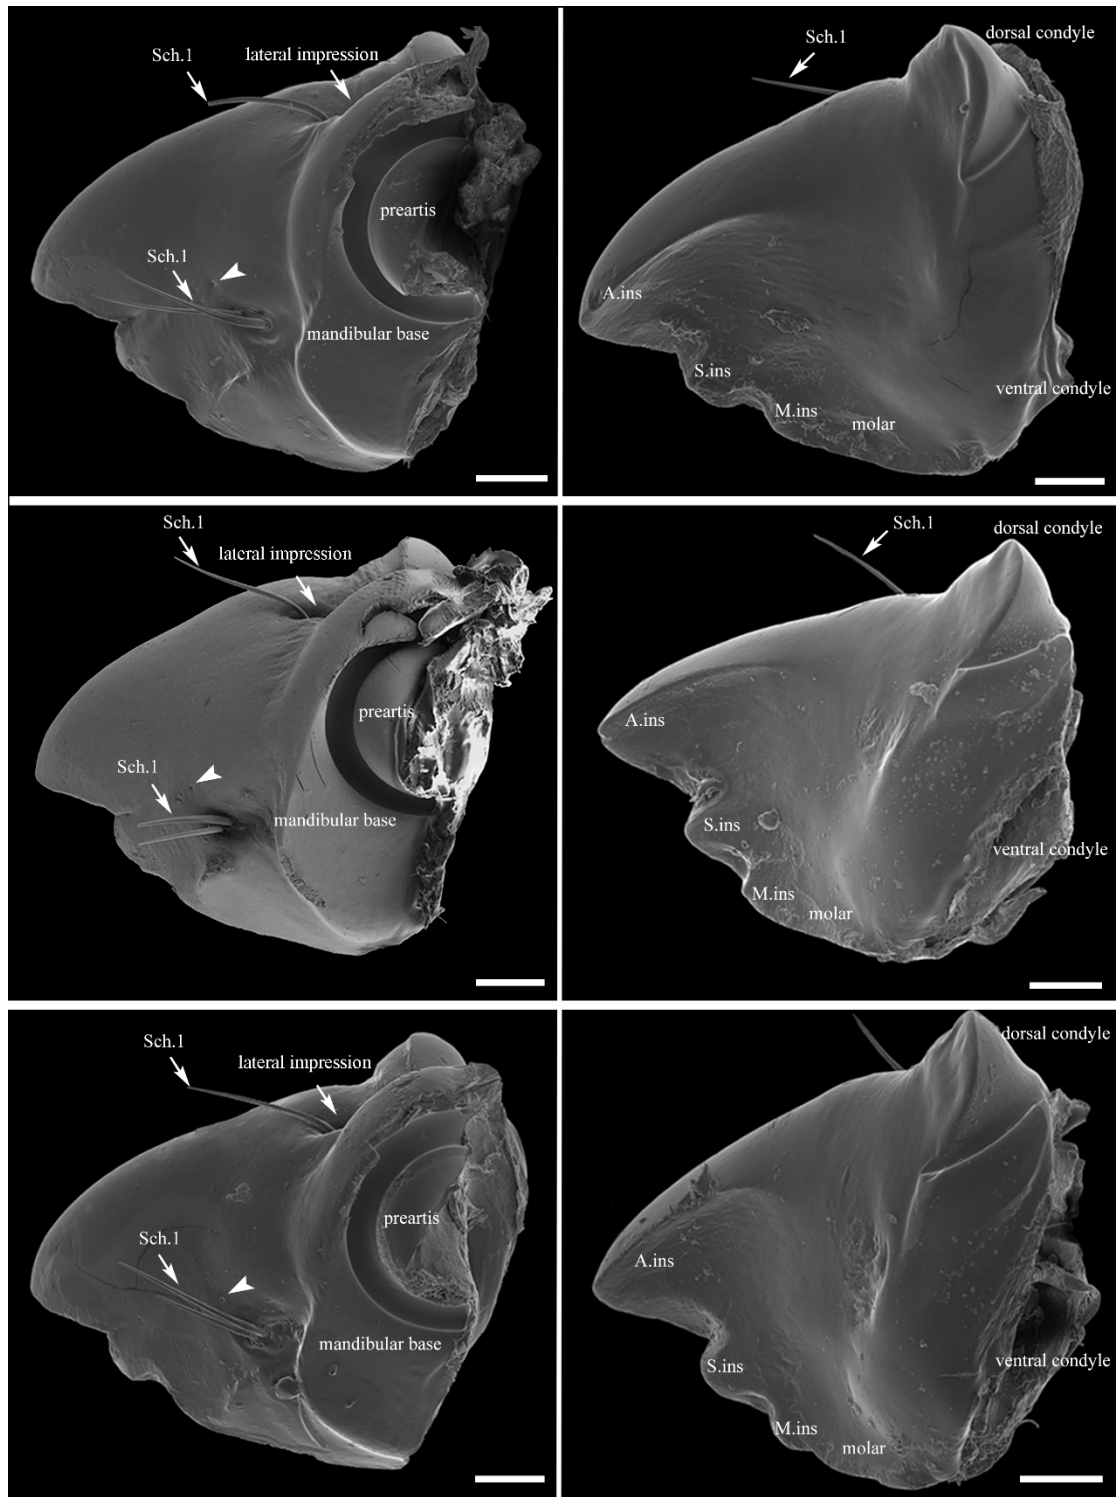

Figure S2. The mandible of an external (left) and an internal (right) view of the three *Tomicus* beetles. Top, *T. yunnanensis*; mid, *T. brevipilosus*; bottom, *T. minor*; Sch.1, sensilla chaetica 1; A.ins, apical incisor; S.ins, subapical incisor; M.ins, median incisor. The equilateral arrowhead shows a unique area of cuticular pores on the mandible. Scale bar = 50  $\mu\text{m}$ .
