# Supplementary material for: Fine Structure of the Mouthparts of Three Tomicus Beetles Co-Infecting Pinus yunnanensis in Southwestern China with Some Functional Comments
Source: MDPI journal article supplement (doi:10.3390/insects14120933), 2023-12-07
Supplement: s1 [file s1]

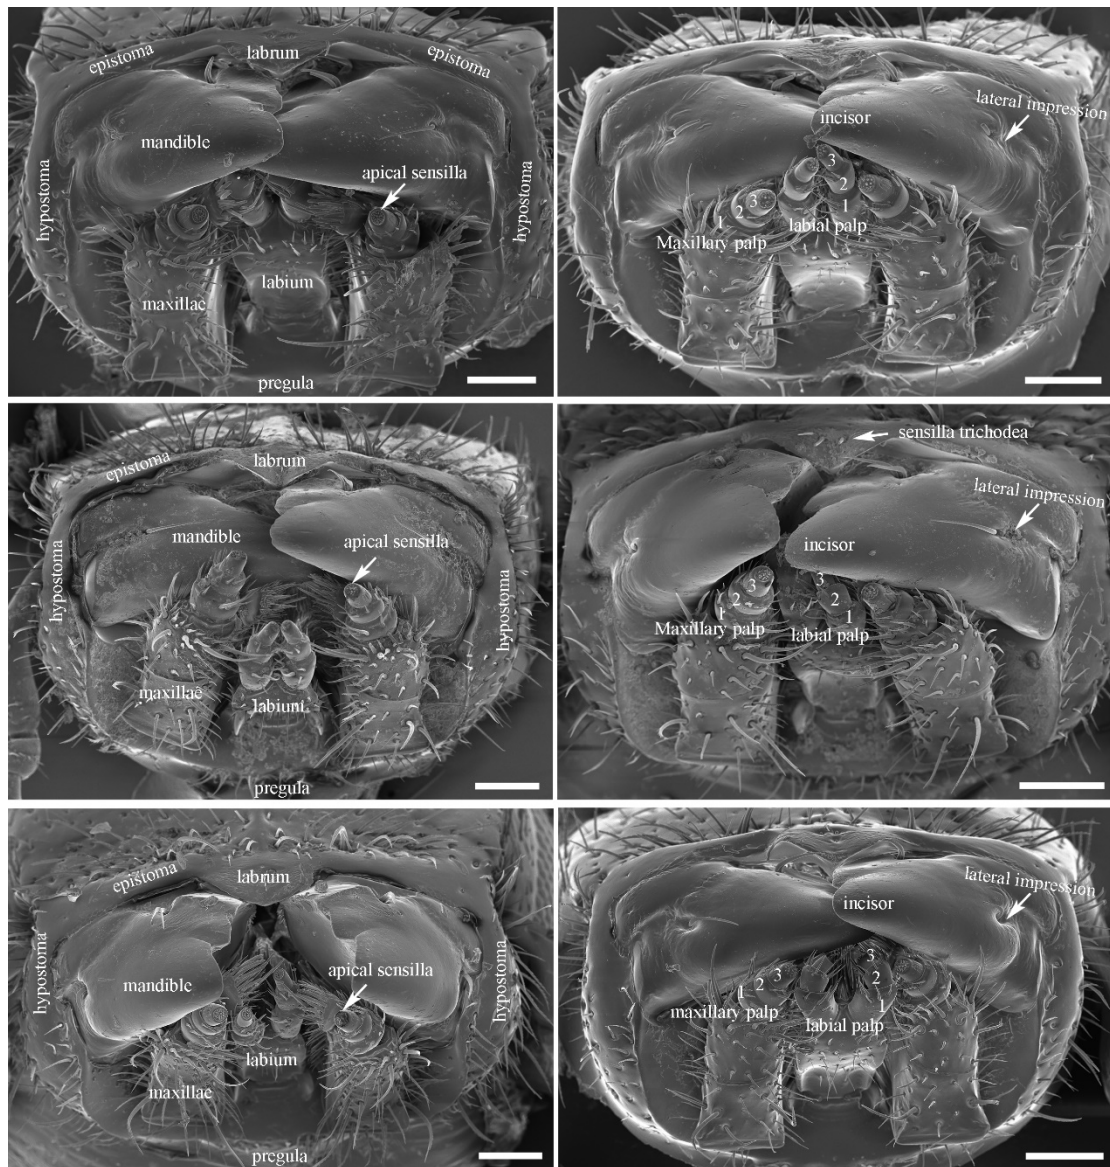

Figure S1. The overall mouthpart of a female (left) and a male (right) of three *Tomicus* beetles. Top, *T. yunnanensis*; mid, *T. brevipilosus*; bottom, *T. minor*. Scale bar = 100 μm.
