# Supplementary material for: Fine Structure of the Mouthparts of Three Tomicus Beetles Co-Infecting Pinus yunnanensis in Southwestern China with Some Functional Comments
Source: MDPI journal article supplement (doi:10.3390/insects14120933), 2023-12-07
Supplement: s1 [file s1]

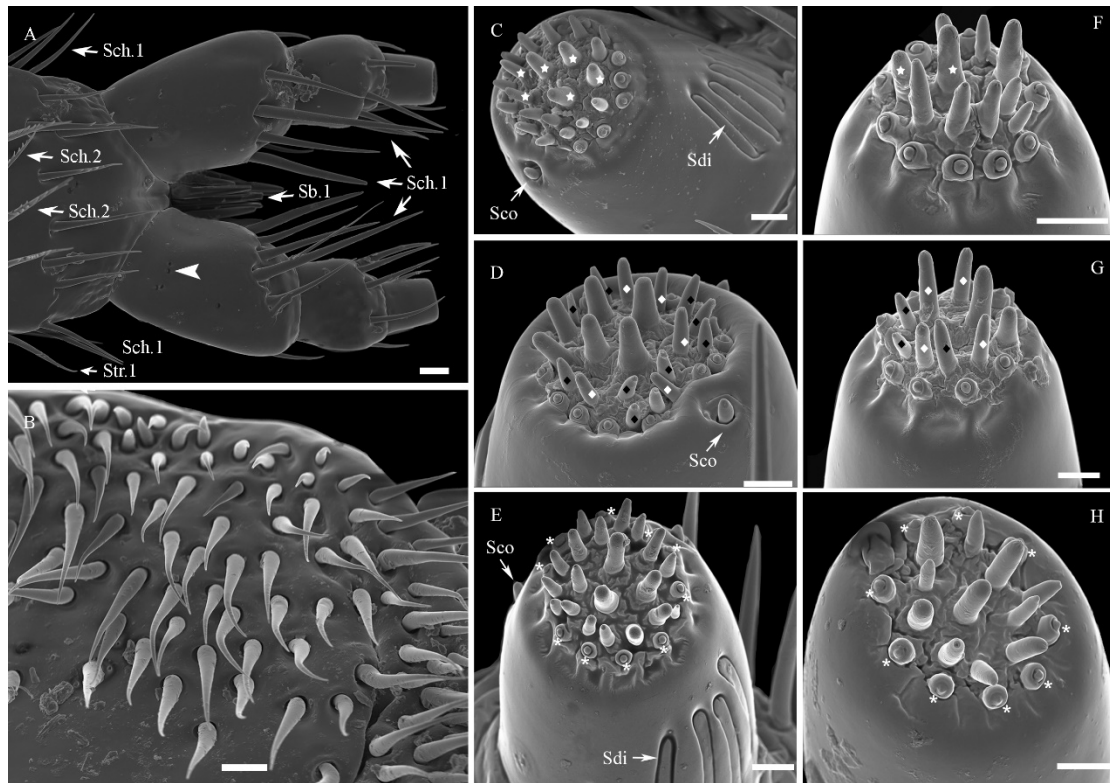

Figure S5. Sensilla type and distribution on the mouthpart elements of the three *Tomicus* beetles. (A) Several sensilla types occur on the terminal prementum of labial palp in the *T. minor*, note the difference between two Sch.2; (B) Many Str.2 concentrates on the ventral view of the galeolacinal complex in *T. brevipilosus*. (C-E) Apical sensilla occur on the maxillary palp of *T. yunnanensis*, *T. minor*, and *T. brevipilosus*, respectively. (F-H) Apical sensilla occur on the labial palp of *T. yunnanensis*, *T. minor*, and *T. brevipilosus*. White stars show sensilla basiconica 2; white and black diamonds show sensilla twig basiconica 1 and 2, respectively; asterisks show sensilla twig basiconica 3. Sch.1-2, sensilla chaetica 1 and 2; Str.1-2; sensilla trichodea 1 and 2; Sb.1, sensilla basiconica 1; Sco, sensilla coeloconica. Scale bar, A-B = 10  $\mu\text{m}$ , C-H = 5  $\mu\text{m}$ .
